# Supplementary material for: Catalyzed eutectic LiBH4–KBH4 system nanoconfined at low temperature for superior hydrogen storage reversibility
Source: Royal Society of Chemistry journal article supplement (doi:10.1039/d4ta06500j), 2024-12-09
Supplement: d4ta06500j1.pdf [file d4ta06500j1.pdf]

## Electronic Supplementary Information

# Catalyzed Eutectic LiBH<sub>4</sub>-KBH<sub>4</sub> System Nanoconfined at Low Temperature for Superior Hydrogen Storage Reversibility

Shanqing Qu,<sup>a</sup> Yaxiong Yang,<sup>b</sup> Chenhui Yan,<sup>a</sup> Mingxia Gao,<sup>\*a</sup> Meihong Wu,<sup>a</sup>  
Zhenglong Li,<sup>b</sup> Shun Wang,<sup>c</sup> Yongfeng Liu,<sup>a</sup> Wenping Sun,<sup>a</sup> Chu Liang,<sup>d</sup> Xin Zhang,<sup>a</sup>  
Hongge Pan<sup>\*ab</sup>

<sup>a</sup> *State Key Laboratory of Silicon and Advanced Semiconductor Materials, School of Materials Science and Engineering, Zhejiang University, Hangzhou 310058, China.*

<sup>b</sup> *Institute of Science and Technology for New Energy, Xi'an Technological University, Xi'an 710021, China.*

<sup>c</sup> *Department of Material Science, Shenzhen MSU-BIT University, Shenzhen 518172, China.*

<sup>d</sup> *Zhejiang Carbon Neutral Innovation Institute, Zhejiang University of Technology, Hangzhou 310014, China.*

*\* Corresponding authors:*

*E-mail address: [gaomx@zju.edu.cn](mailto:gaomx@zju.edu.cn) (M Gao), [honggepan@zju.edu.cn](mailto:honggepan@zju.edu.cn) (H Pan)*

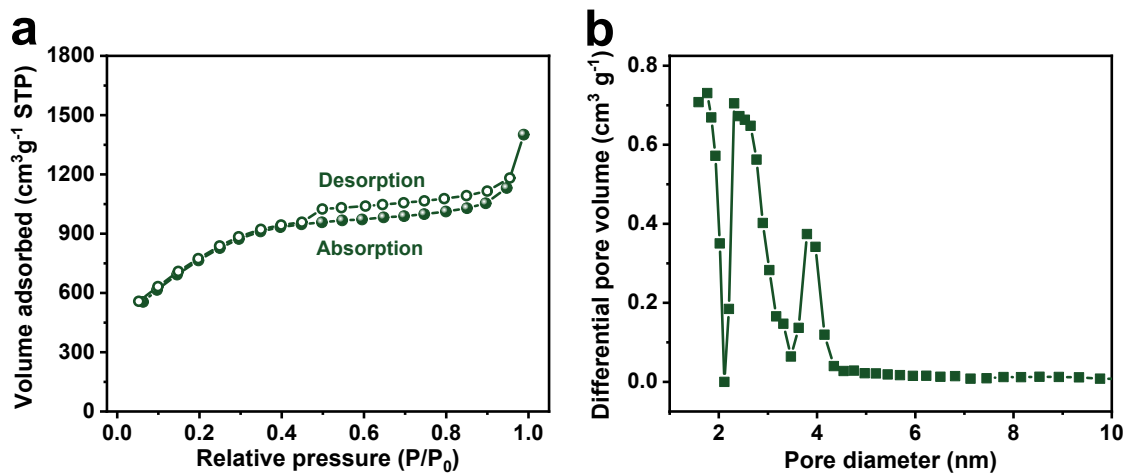

**Fig. S1.** (a) N<sub>2</sub> sorption isotherms and (b) pore size distributions of the porous carbon scaffold.

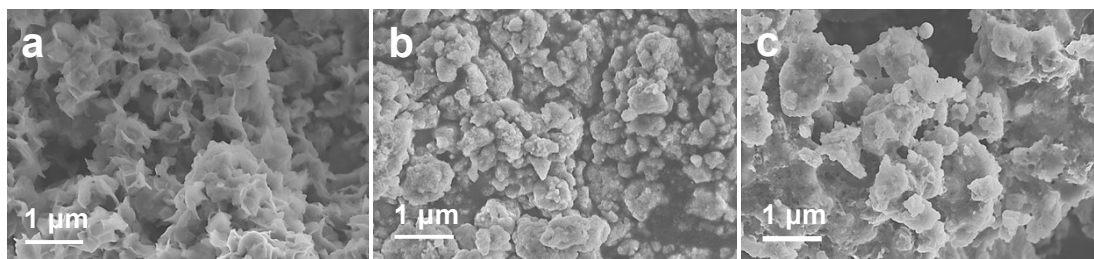

**Fig. S2.** SEM images of (a) the as-milled pristine LiBH<sub>4</sub>, (b) Li/KBH<sub>4</sub> and (c) Li/KBH<sub>4</sub>+0.1NiCp<sub>2</sub>.

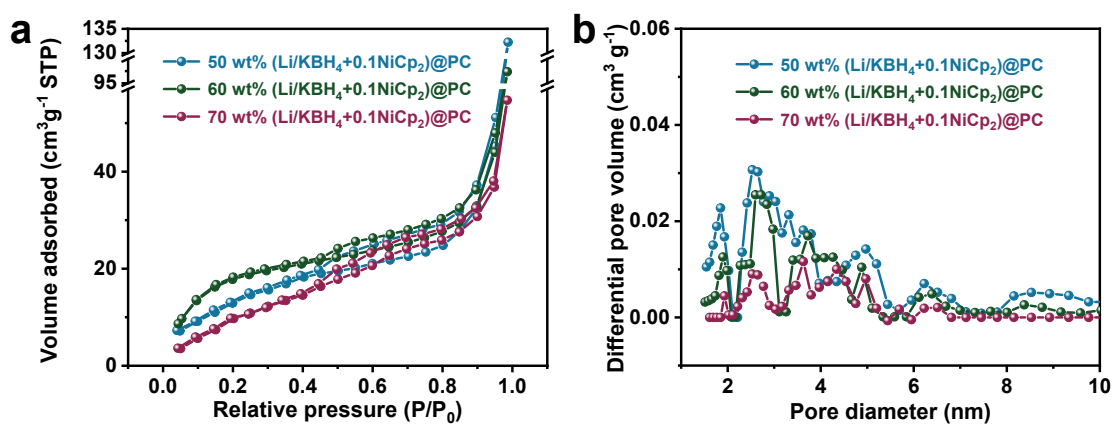

**Fig. S3.** (a) N<sub>2</sub> sorption isotherms and (b) pore size distributions of the confined systems with different loadings of Li/KBH<sub>4</sub>+0.1NiCp<sub>2</sub>.

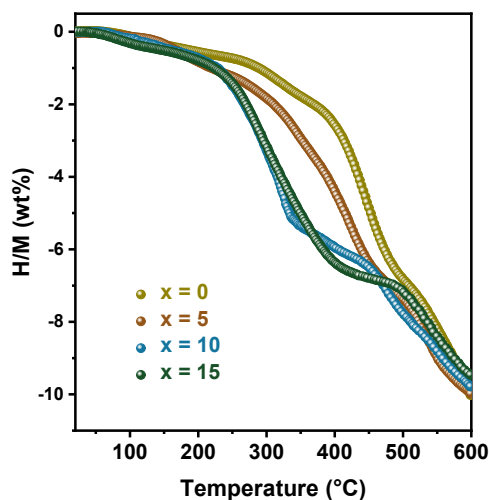

**Fig. S4.** Dehydrogenation curves of the Li/KBH<sub>4</sub>+x wt% NiCp<sub>2</sub> systems with x = 0, 5, 10 and 15.

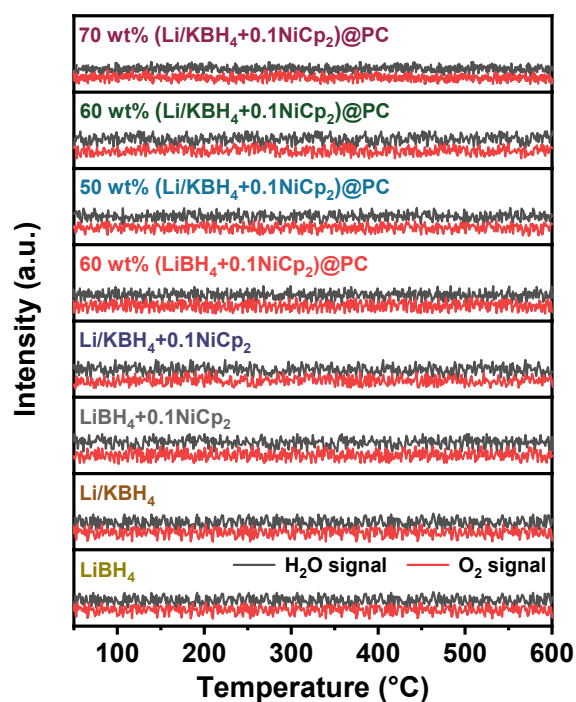

**Fig. S5.** H<sub>2</sub>O and O<sub>2</sub> signals of TPD–MS curves of the confined systems loaded with (Li/KBH<sub>4</sub>+0.1NiCp<sub>2</sub>), with 60 wt% (LiBH<sub>4</sub>+0.1NiCp<sub>2</sub>) and the as–milled systems of Li/KBH<sub>4</sub>+0.1NiCp<sub>2</sub>, LiBH<sub>4</sub>+0.1NiCp<sub>2</sub>, Li/KBH<sub>4</sub> as well as the pristine LiBH<sub>4</sub>.

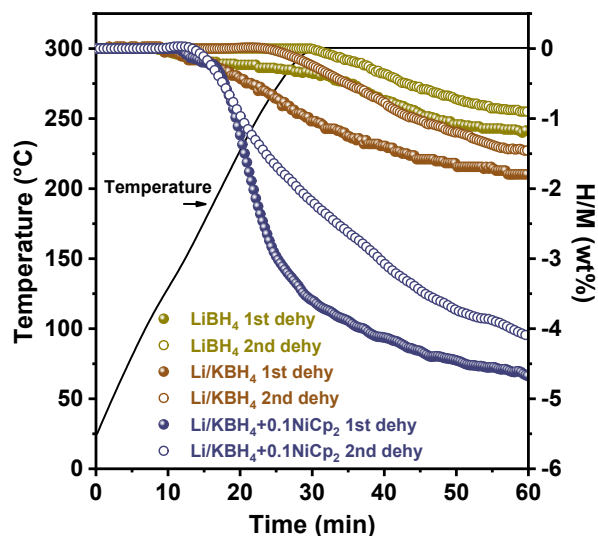

**Fig. S6.** Isothermal dehydrogenation curves of the as-milled pristine  $\text{LiBH}_4$ ,  $\text{Li/KBH}_4$  and  $\text{Li/KBH}_4+0.1\text{NiCp}_2$  at a cyclic regime of dehydrogenation at  $300\text{ }^\circ\text{C}$  for 60 min in static vacuum and hydrogenation at  $400\text{ }^\circ\text{C}/10\text{ MPa H}_2$  pressure for 120 min.

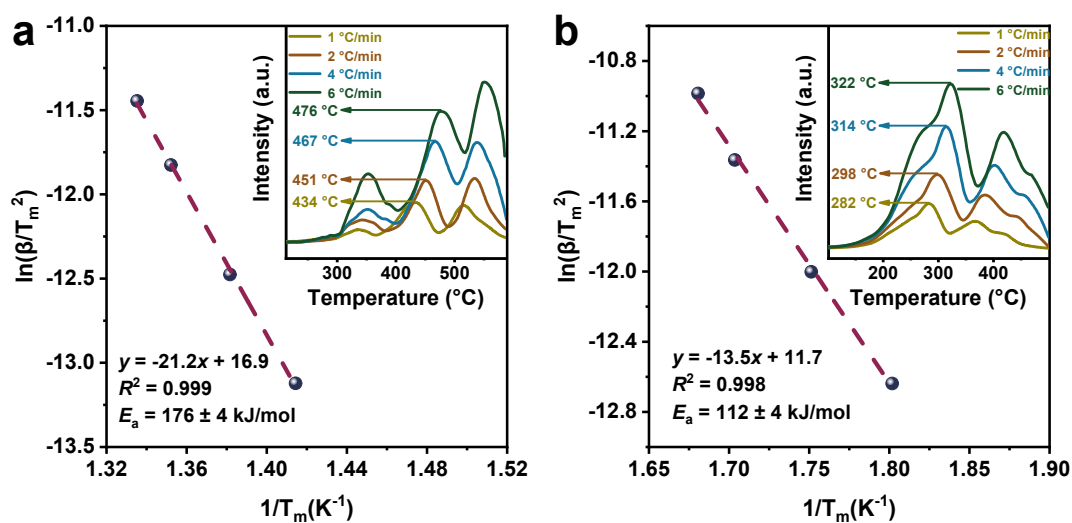

**Fig. S7.** The Kissinger's plots of the (a)  $\text{Li/KBH}_4$  and (b)  $\text{Li/KBH}_4+0.1\text{NiCp}_2$  systems. The insets are their TPD-MS curves measured at different heating rates.

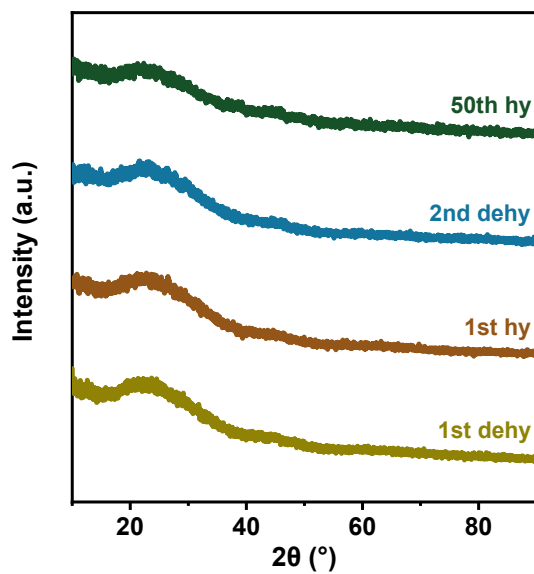

**Fig. S8.** XRD patterns the confined system with 60 wt% (Li/KBH<sub>4</sub>+0.1NiCp<sub>2</sub>) at different dehydrogenation (dehy) and hydrogenation (hy) states.

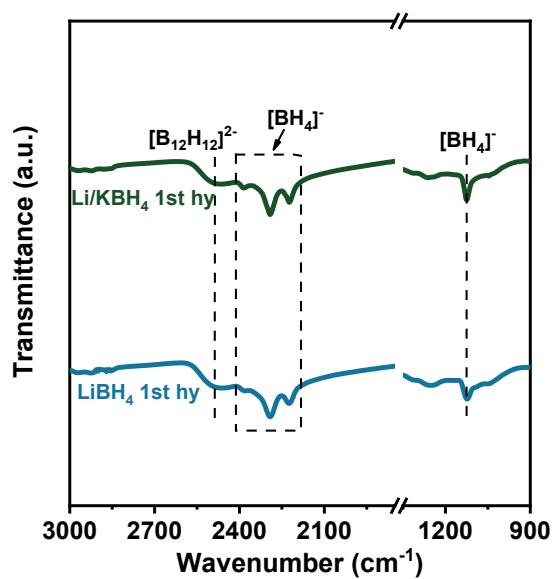

**Fig. S9.** FTIR spectra of the Li/KBH<sub>4</sub> and LiBH<sub>4</sub> at their initial hydrogenation (hy) states.

**Table S1.** The cyclic dehydrogenation capacities of the confined system with 60 wt% (Li/KBH<sub>4</sub>+0.1NiCp<sub>2</sub>).

|                       |           |           |           |           |           |           |           |           |           |           |
|-----------------------|-----------|-----------|-----------|-----------|-----------|-----------|-----------|-----------|-----------|-----------|
| <b>Cycle number</b>   | <b>1</b>  | <b>2</b>  | <b>3</b>  | <b>4</b>  | <b>5</b>  | <b>6</b>  | <b>7</b>  | <b>8</b>  | <b>9</b>  | <b>10</b> |
| <b>Capacity (wt%)</b> | 7.00      | 6.70      | 6.68      | 6.67      | 6.67      | 6.67      | 6.66      | 6.66      | 6.66      | 6.65      |
| <b>Cycle number</b>   | <b>11</b> | <b>12</b> | <b>13</b> | <b>14</b> | <b>15</b> | <b>16</b> | <b>17</b> | <b>18</b> | <b>19</b> | <b>20</b> |
| <b>Capacity (wt%)</b> | 6.65      | 6.66      | 6.65      | 6.64      | 6.64      | 6.64      | 6.65      | 6.64      | 6.63      | 6.63      |
| <b>Cycle number</b>   | <b>21</b> | <b>22</b> | <b>23</b> | <b>24</b> | <b>25</b> | <b>26</b> | <b>27</b> | <b>28</b> | <b>29</b> | <b>30</b> |
| <b>Capacity (wt%)</b> | 6.64      | 6.65      | 6.65      | 6.64      | 6.64      | 6.64      | 6.63      | 6.63      | 6.63      | 6.63      |
| <b>Cycle number</b>   | <b>31</b> | <b>32</b> | <b>33</b> | <b>34</b> | <b>35</b> | <b>36</b> | <b>37</b> | <b>38</b> | <b>39</b> | <b>40</b> |
| <b>Capacity (wt%)</b> | 6.64      | 6.64      | 6.64      | 6.63      | 6.63      | 6.63      | 6.64      | 6.65      | 6.65      | 6.64      |
| <b>Cycle number</b>   | <b>41</b> | <b>42</b> | <b>43</b> | <b>44</b> | <b>45</b> | <b>46</b> | <b>47</b> | <b>48</b> | <b>49</b> | <b>50</b> |
| <b>Capacity (wt%)</b> | 6.64      | 6.64      | 6.63      | 6.62      | 6.62      | 6.63      | 6.63      | 6.62      | 6.62      | 6.62      |
